# Supplementary material for: A Systems Analysis With “Simplified Source-Sink Model” Reveals Metabolic Reprogramming in a Pair of Source-to-Sink Organs During Early Fruit Development in Tomato by LED Light Treatments
Source: Front Plant Sci. 2018 Oct 9;9:1439. doi: 10.3389/fpls.2018.01439 (PMC6191670; doi:10.3389/fpls.2018.01439)
Supplement: TABLE S1 — Fruit developmental stages used for the study. [file Table_1.XLSX]

## Sheet: Supplemental Table S1
Supplemental Table S1. Fruit developmental stages used for the study.
	growth period (week)	light intensity (PPFD)	average of fruit fresh weight (g)	SE of fruit fresh weight (g)	average of fruit width (mm)	SE of fruit width (mm)	developmental stage by color	Number of plants	Number of fruits
	0week	PPF0	-	-	-	-	green	-	-
	1week	PPF200	1.51642	0.359904	15.2717	1.90905	green	3	9
	1week	PPF500	2.3968	0.298189	17.975	0.969904	green	3	9
	1week	PPF1000	2.32476	0.530797	16.9	1.96323	green	3	9
	2week	PPF200	5.48738	1.98176	18.9437	3.96685	green	3	9
	2week	PPF500	21.635	2.17118	37.0833	1.7924	green	3	9
	2week	PPF1000	17.9797	2.64459	36.9	1.93075	green	3	10
	3week	PPF200	8.4982	0.569836	no data	no data	green	4	5
	3week	PPF500	12.7125	2.15506	no data	no data	green	4	10
	3week	PPF1000	39.6697	3.8514	no data	no data	mature green	4	12
	4week	PPF200	8.20909	1.72483	no data	no data	green	4	11
	4week	PPF500	28.3727	4.26337	no data	no data	mature green	4	11
	4week	PPF1000	54.1088	7.52828	no data	no data	breaker	4	8
